# Supplementary material for: A colorimetric detection strategy and micromotor-assisted photo-Fenton like degradation for hydroquinone based on the peroxidase-like activity of Co3O4–CeO2 nanocages
Source: Royal Society of Chemistry journal article supplement (doi:10.1039/d2cy01192a), 2022-01-01
Supplement: d2cy01192a1.pdf [file d2cy01192a1.pdf]

## ELECTRONIC SUPPLEMENTARY INFORMATION

### **A colorimetric detection strategy and micromotor-assisted photo-Fenton like degradation for hydroquinone based on the peroxidase-like activity of $\text{Co}_3\text{O}_4\text{-CeO}_2$ nanocages**

Kaiyuan Hu<sup>a</sup>, Jia Li<sup>\*a</sup>, Yang Han<sup>a</sup>, Dickon H.L. Ng<sup>b</sup>, Ningning Xing<sup>a</sup>, Yangsai Lyu<sup>\*c</sup>

<sup>a</sup>School of Material Science and Engineering, University of Jinan, Jinan, 250022, China. E-mail

address: mse\_lj@ujn.edu.cn (Jia Li).

<sup>b</sup>School of Science and Engineering, The Chinese University of Hong Kong (Shenzhen), Shenzhen,

China.

<sup>c</sup>Department of Mathematics and Statistics, Queen's University. E-mail address: 21y136@queensu.ca

(Yangsai Lyu)

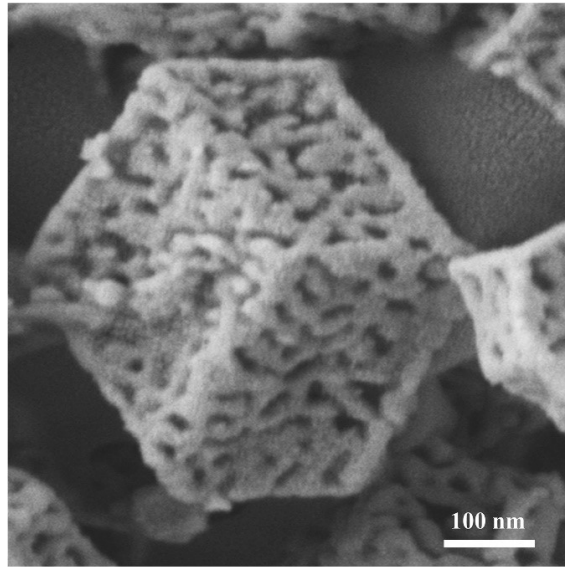

**Fig. S1** SEM image of  $\text{Co}_3\text{O}_4\text{-CeO}_2$  nanocages after reaction

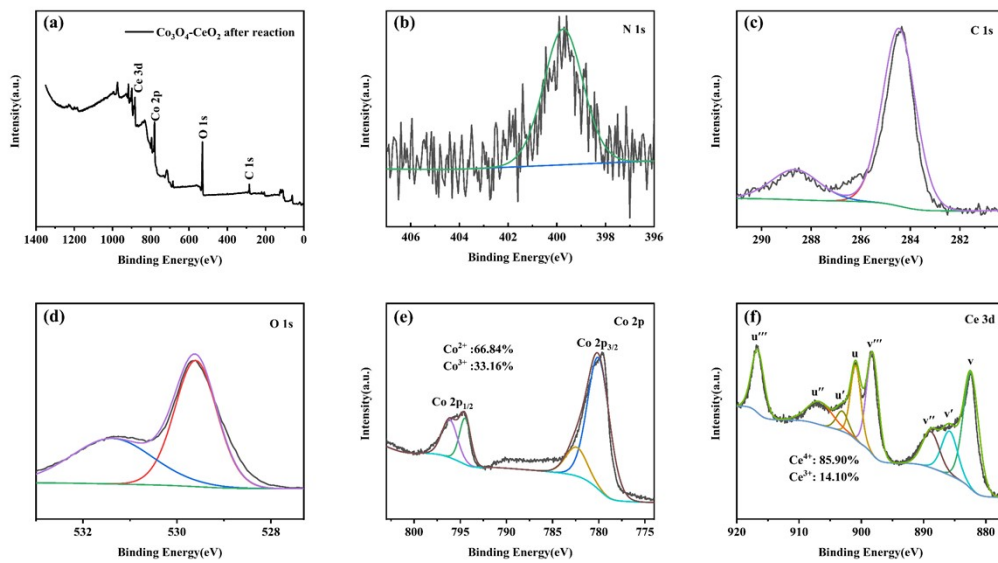

**Fig. S2** Full scanned XPS spectra (a), high-resolution spectra N 1s (b), C 1s (c), O 1s (d), Co 2p (e), Ce 3d (f) of  $\text{Co}_3\text{O}_4\text{-CeO}_2$  after reaction.

**Table S1** Comparison of degradation performance for pollutants with other reported micromotors.

| Micromotor                                                       | Pollutants     | Degradation time(min) | Degradation rate (%) | Ref.      |
|------------------------------------------------------------------|----------------|-----------------------|----------------------|-----------|
| Pt NPs on Ag                                                     | Methylene blue | 30                    | 90.42                | [1]       |
| Ag-ZIF                                                           | Rhodamine b    | 150                   | 93.1                 | [2]       |
| Bi <sub>2</sub> O <sub>3</sub> /BiOCl-based hybrid               | Rhodamine b    | 360                   | 90                   | [3]       |
| HRP-MIL-100(Fe)@TiO <sub>2</sub> @Fe <sub>3</sub> O <sub>4</sub> | HQ             | 80                    | 90.1                 | [4]       |
| Co <sub>3</sub> O <sub>4</sub> -CeO <sub>2</sub> nanocages       | HQ             | 210                   | 98.21                | This work |

### Notes and references

- 1 J. Wu, H. Yu, W. Liu, C. Dong, M. Wu and C. Zhang, *J. Environ. Chem. Eng.*, 2022, **10**, 107034.
- 2 R. Wang, W. Guo, X. Li, Z. Liu, H. Liu and S. Ding, *RSC Adv.*, 2017, **7**, 42462-42467.
- 3 F. Mushtaq, M. Guerrero, M. S. Sakar, M. Hoop, A. M. Lindo, J. Sort, X. Chen, B. J. Nelson, E. Pellicer and S. Pané, *J. Mater. Chem. A*, 2015, **3**, 23670-23676.
- 4 J. Yang, J. Li, X. Yan, Y. Lyu, N. Xing, P. Yang, P. Song and M. Zuo, *ACS Appl. Mater. Interfaces*, 2022, **14**, 6484-6498.
